# Supplementary material for: Anisotropic optical properties of GeS investigated by optical absorption and photoreflectance
Source: Royal Society of Chemistry journal article supplement (doi:10.1039/d0ma00146e), 2020-01-01
Supplement: d0ma00146e1.pdf [file d0ma00146e1.pdf]

# Supporting Information for

## Anisotropic optical properties of GeS investigated by optical absorption and photoreflectance

Agata Tołłoczko\*, Robert Oliva, Tomasz Woźniak, Jan Kopaczek, Paweł  
Scharoch, and Robert Kudrawiec

*Department of Semiconductor Materials Engineering,  
Faculty of Fundamental Problems of Technology,  
Wrocław University of Science and Technology,  
Wybrzeże Wyspiańskiego 27, 50-370 Wrocław, Poland*

\*Corresponding author.

E-mail address: [agata.tolloczko@pwr.edu.pl](mailto:agata.tolloczko@pwr.edu.pl)

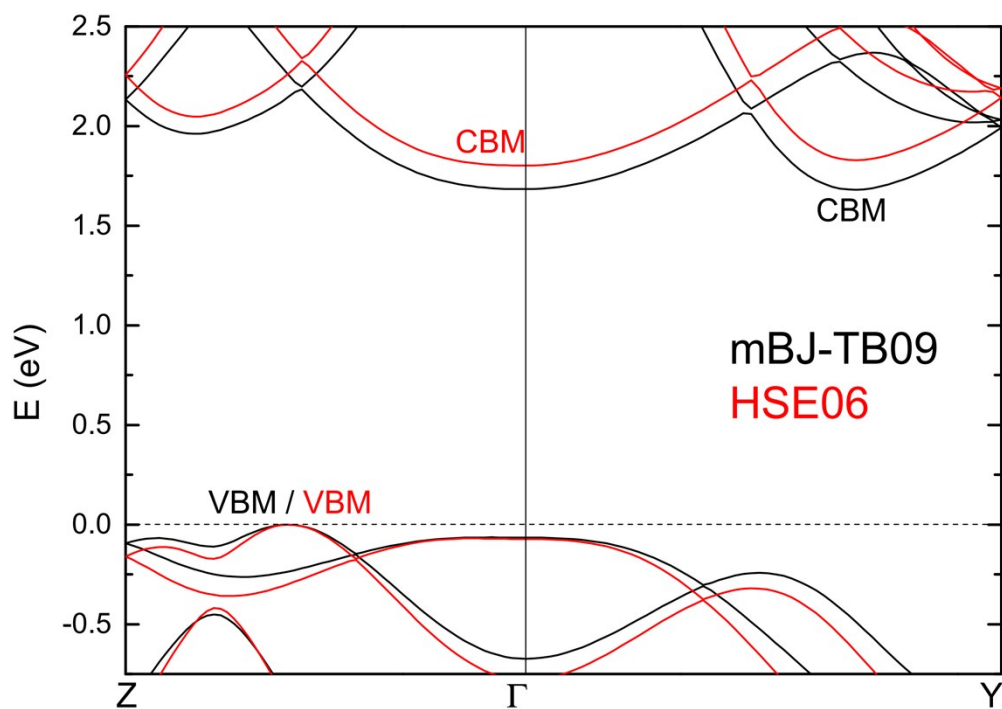

**Fig. S1.** Electronic band structures calculated with mBJ-TB09 (black) and HSE06 (red). Positions of VBM and CBM are indicated.

**Table S1.** The energies of optical transitions  $E_0$ ,  $E_1$  and  $E_2$  calculated using mBJ-TB09 potential and HSE06 hybrid functional.

| Transition | Assignment                         | Energy (eV) |                        |                     |
|------------|------------------------------------|-------------|------------------------|---------------------|
|            |                                    | Experiment  | Calculation – mBJ-TB09 | Calculation – HSE06 |
| $E_0$      | $\Gamma$ -Z $\rightarrow$ $\Delta$ | 1.685       | 1.607                  | 1.829               |
| $E_1$      | $\Gamma$                           | 1.701       | 1.628                  | 1.875               |
| $E_2$      | $\Delta$                           | 1.797       | 2.039                  | 2.322               |

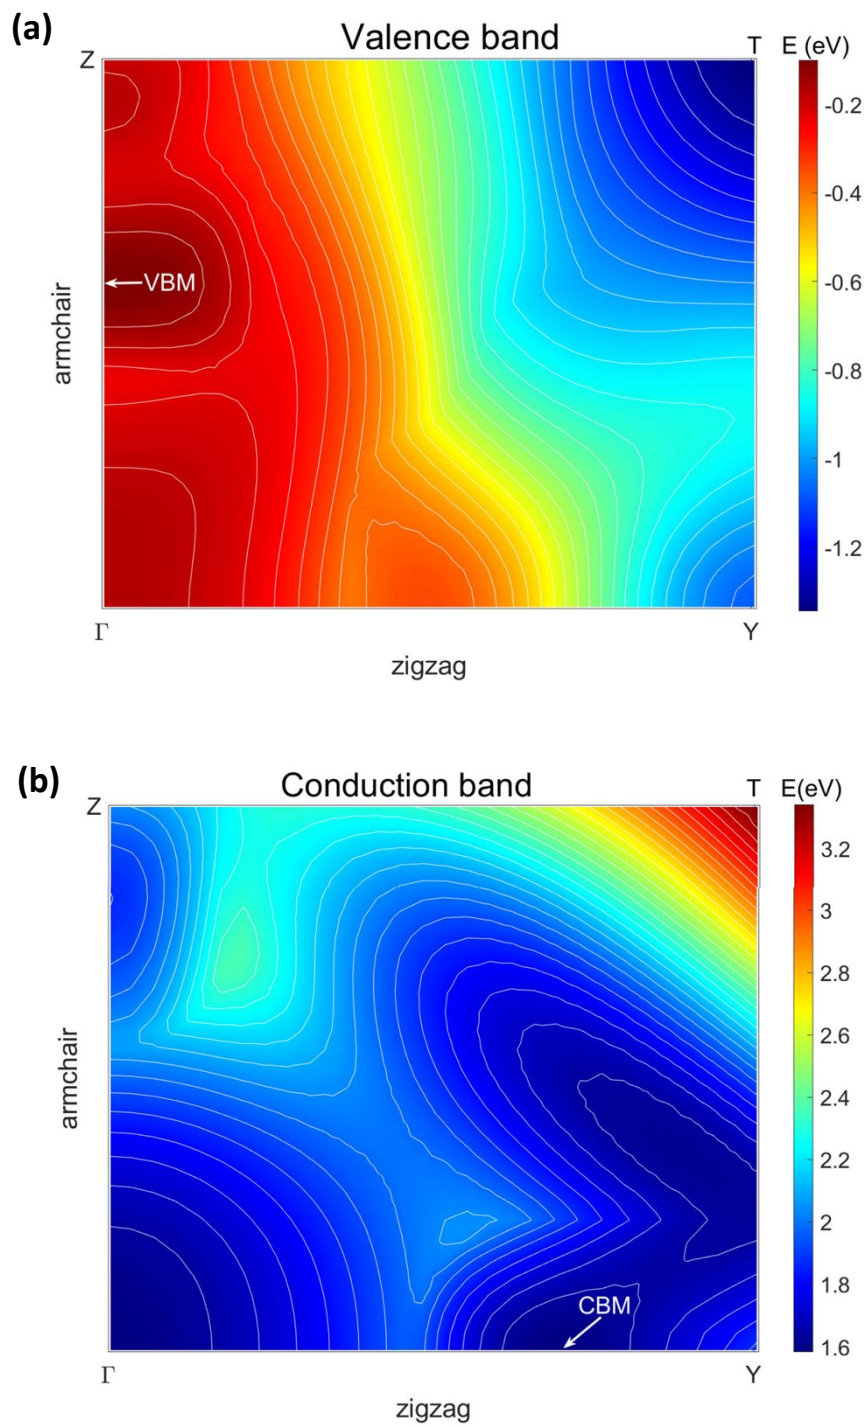

**Fig. S2.** Valence band (a) and conduction band (b) on  $\Gamma$ -Z-T-Y plane.

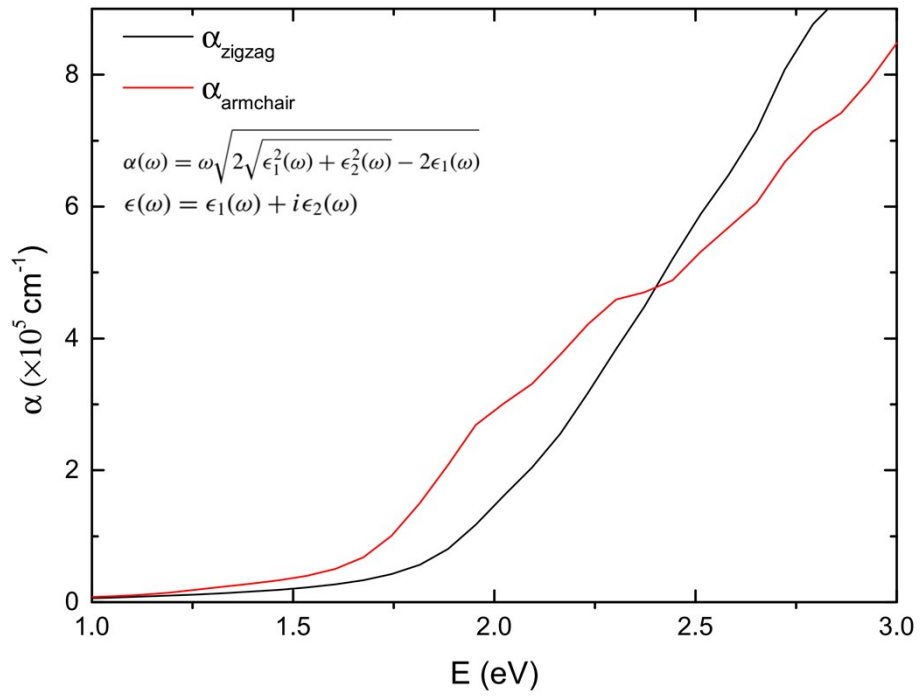

**Fig. S3.** Calculated absorption coefficient on zigzag and armchair directions.
